# Supplementary material for: Storm surge frequency, magnitude, and cumulative storm beach impact along the U.S. east coast
Source: Copernicus journal article supplement (doi:10.5194/egusphere-2024-656), 2024-03-19
Supplement: Supplementary file 1 [file egusphere-2024-656-supplement.zip]

Archive with 2 entries (2 files):
- Supplement 1 Dominquez et al.pdf
- Supplement 2 Dominguez et al.pdf
