# Supplementary material for: Storm surge frequency, magnitude, and cumulative storm beach impact along the U.S. east coast
Source: Copernicus journal article supplement (doi:10.5194/egusphere-2024-656), 2024-03-19
Supplement: Supplementary file 1 [file egusphere-2024-656-supplement.zip › Supplement 1 Dominquez et al.pdf]

Supplement 1. List of notable extratropical storms (sources: media reports, state and federal government agencies, scientific reports. Notes: (1) from September through April, the U.S. east coast is battered by up to 40 nor'easters spanning hundreds -- even thousands -- of miles in diameter; (2) Extratropical storms can impact coasts for days. In those cases, we selected the most representative day of impact for largest swath of coast.

| Storm name                                                   | Date of storm or landfall | Notes                                                                                    |
|--------------------------------------------------------------|---------------------------|------------------------------------------------------------------------------------------|
| Nor'easter May 11-13, 2008 (aka, Mother's Day storm 2008)    | 5/12/2008                 |                                                                                          |
| November 2009 nor'easter (remnants of hurricane Ida) Nor'ida | 11/12/2009                |                                                                                          |
| N.A. Blizzard of 2009                                        | 12/18/2009                |                                                                                          |
| N.A. Christmas Blizzard 2009                                 | 12/24/2009                |                                                                                          |
| February 5-6 2010 North American blizzard (Snowmageddon)     | 2/5/2010                  |                                                                                          |
| March 2010 nor'easter                                        | 3/14/2010                 |                                                                                          |
| March 28-20, 201- nor'easter                                 | 3/28/2010                 | part of 4 nor'easters in a row called the "Fouresters"; some with minor coastal flooding |
| December 2010 North American blizzard (aka Boxing Day storm) | 12/26/2010                |                                                                                          |
| January 8–13, 2011 North American blizzard                   | 1/11/2011                 |                                                                                          |
| January 25–27, 2011 North American blizzard                  | 1/26/2011                 |                                                                                          |
| 2011 Halloween nor'easter (with remnants of Hurricane Rita)  | 10/30/2011                |                                                                                          |
| Super Storm Sandy                                            | 10/28/2012                |                                                                                          |
| New Jersey nor'easter                                        | 11/7/2022                 | 1.5 weeks after Sandy, caused evacuations                                                |
| Late December 2012 North American storm complex              | 12/27/2012                | date hit Delmarva                                                                        |
| Early February 2013 North American blizzard                  | 2/8/2013                  |                                                                                          |
| March 2013 nor'easter                                        | 3/6/2013                  |                                                                                          |
| March 2014 nor'easter                                        | 3/26/2014                 | bomb cyclone                                                                             |
| Winter storm NJ                                              | 11/26/2014                | minor coastal flooding                                                                   |
| strong NJ Nor'easter                                         | 12/10/2014                | minor to moderate coastal flooding                                                       |
| Winter Storm Juno/Jan 2015 N.A. Blizzard                     | 1/28/2015                 |                                                                                          |

|                                                                                                                                |            |                                                                                                                         |
|--------------------------------------------------------------------------------------------------------------------------------|------------|-------------------------------------------------------------------------------------------------------------------------|
| October 2015 N.A. storm complex                                                                                                | 10/2/2015  | effected the south-GA, FL, SC                                                                                           |
| January 2016 U.S. blizzard (also known as Winter Storm Jonas, Snowzilla, or The Blizzard of 2016 by media outlets)             | 1/23/2016  |                                                                                                                         |
| N.A. Blizzard of 2017 (aka Niko)                                                                                               | 2/9/2017   |                                                                                                                         |
| February 12–14, 2017 North American blizzard (Winter Storm Orson)                                                              | 2/13/2017  | back to back with one a week earlier, "bombagenesis"                                                                    |
| March 2017 North American blizzard (also known as Winter Storm Stella, Blizzard Eugene, and Blizzard of 2017 by media outlets) | 3/14/2017  |                                                                                                                         |
| October 2017 North American storm complex                                                                                      | 10/29/2017 | affected much of mid-Atlantic and New England                                                                           |
| January 2018 North American blizzard (aka, Winter Storm Grayson, Blizzard of 2018 and Storm Brody)                             | 1/4/2018   | "historic bomb cyclone" - in Maine set records for the highest and third-highest tides in history AND March 2018 storms |
| March 1-3, 2018 nor'easter (also known as Winter Storm Riley by media outlets)                                                 | 3/2/2018   | entire coast                                                                                                            |
| March 6-8, 2018 nor'easter (also known as Winter Storm Quinn, by media outlets)                                                | 3/7/2018   | reached Outer Banks 3/6, clustered with prior storm                                                                     |
| March 12–14, 2018 nor'easter (also known as Winter Storm Skylar by media outlets)                                              | 3/13/2018  | clustering winter 2017-2018, from climate.gov "Nor'easters pummel the U.S. Northeast in late winter 2018"               |
| March 20–22, 2018 nor'easter (also known as Winter Storm Toby and Four'Easter by media outlets)                                | 3/21/2018  | date new low formed over Ches. Bay                                                                                      |
| Late 2018, early 2019-none reported                                                                                            |            | none                                                                                                                    |
| Late 2019, early 2020-none reported                                                                                            |            | none                                                                                                                    |
| Early December 2020 nor'easter                                                                                                 | 12/5/2020  | developed in NC                                                                                                         |
| Mid-December 2020 nor'easter                                                                                                   | 12/17/2020 |                                                                                                                         |
| Ground Hog Day nor'easter 2021                                                                                                 | 2/2/2021   |                                                                                                                         |
| April 2021 nor'easter (Also known as 2021 Spring nor'easter by media outlets)                                                  | 4/16/2021  |                                                                                                                         |

|                                                            |            |              |
|------------------------------------------------------------|------------|--------------|
| Late October nor'easter 2021                               | 10/26/2021 | bomb cyclone |
| January 2022 North American blizzard                       | 1/29/2022  | DE to Canada |
| April 2022 nor'easter                                      | 4/19/2022  |              |
| December 2022 N.A. winter storm (aka Winter Storm Elliott) | 12/23/2022 |              |
