# Supplementary material for: Storm surge frequency, magnitude, and cumulative storm beach impact along the U.S. east coast
Source: Copernicus journal article supplement (doi:10.5194/egusphere-2024-656), 2024-03-19
Supplement: Supplementary file 1 [file egusphere-2024-656-supplement.zip › Supplement 2 Dominguez et al.pdf]

Supplement 2. List of notable tropical storms (sources: [coast.noaa.gov/hurricanes](http://coast.noaa.gov/hurricanes); maps from [www.nhc.noaa.gov/data/tracks/](http://www.nhc.noaa.gov/data/tracks/)).

| Storm name | Date of storm or landfall | Landfall     | Category | Notes                                                                                                                                                                                                  |
|------------|---------------------------|--------------|----------|--------------------------------------------------------------------------------------------------------------------------------------------------------------------------------------------------------|
| Bertha     | 7/15/2008                 | NONE         | TS       | H2 and H1 off FL coast app. 900 miles offshore, downgraded to TS off GA, SC, NC with closest approach app. 600 miles offshore NC                                                                       |
| Cristobal  | 7/21/2008                 | NONE         | TS       | tracked closely along SC, NC coast then moved more and more offshore to the north                                                                                                                      |
| Fay        | 8/19/2008                 | FL           | TS       | directly over KW, FL                                                                                                                                                                                   |
| Hanna      | 9/6/2008                  | SC/NC border | TS       |                                                                                                                                                                                                        |
| Ike        | 9/8/2008                  | NONE         | H1       | tracked south of KW, FL                                                                                                                                                                                |
| Kyle       | 9/27/2008                 | NONE         | H1       | tracked north along US coast reaching H1 off GA and remaining an H1 to north; closest approach app. 300 miles off NC                                                                                   |
| Paloma     | 11/10/2008                | NONE         | TD       | stayed south of FL                                                                                                                                                                                     |
| One 2009   | 5/28/2009                 | NONE         | TS       | closest approach 300 miles of NC                                                                                                                                                                       |
| Bill       | 8/22/2009                 | NONE         | H2       | H3 off FL; H2 off GA, SC, NC (closest approach app. 300 miles); H1 rest of coast to the north                                                                                                          |
| Danny      | 8/27/2009                 | NONE         | TS       | FL, GA, closest app. 250 miles                                                                                                                                                                         |
| Bonnie     | 7/23/2010                 | FL           | TS       | southern tip of FL                                                                                                                                                                                     |
| Earl       | 9/3/2010                  | NONE         | H2       | tracked along entire US east coast starting as a H4 in FL and progressively decreasing in strength, H3 off GA, H2 off SC and NC, H1 off VA and MD, TS off NJ, closest approach NC app. 100 mi offshore |
| Igor       | 9/20/2010                 | NONE         | H1       | tracked along entire US east coast as H1, closest approach app. 550 miles off NC                                                                                                                       |
| Nicole     | 9/29/2010                 | NONE         | TS       | southern FL                                                                                                                                                                                            |
| Paula      | 10/15/2010                | NONE         | TS       | south of KW FL, did not come north of Cuba                                                                                                                                                             |
| Tomas      | 11/6/2010                 | NONE         | H1       | closest approach 500 miles off south FL coast, downgraded to TS and became an ET near south FL                                                                                                         |
| Brett      | 7/17/2011                 | NONE         | TD       | unusual track to south along FL coast reaching TS                                                                                                                                                      |
| Emily      | 8/6/2011                  | NONE         | TD       | only impact to FL, upgraded to a TS for a short period off the FL coast                                                                                                                                |
| Irene      | 8/27/2011                 | NC           | H1       | H2 along FL coast, downgraded to H1 along GA, SC, NC, VA, MD coasts, TS off NJ                                                                                                                         |

|            |            |              |    |                                                                                                                                  |
|------------|------------|--------------|----|----------------------------------------------------------------------------------------------------------------------------------|
| Unnamed    | 9/2/2011   | NONE         | TS | app. 300 miles offshore of New England                                                                                           |
| Katia      | 9/8/2011   | NONE         | H1 | tracked entire coast, closest approach app. 300 miles off US est coast                                                           |
| Maria      | 9/15/2011  | NONE         | H1 | tracked entire coast, closest approach app. 500 miles off US est coast                                                           |
| Ophelia    | 10/2/2011  | NONE         | H3 | tracked entire coast as a hurricane reaching H4 off SC and mostly H3 for rest of coast; closest approach app. 600 miles offshore |
| Sean       | 11/11/2011 | NONE         | TS | closest approach app. 600 miles offshore, changed to ET off VA coast                                                             |
| Alberto    | 5/20/2012  | NONE         | TS | came to N FL then tracked along the SC coast                                                                                     |
| Beryl      | 5/28/2012  | FL/GA        | TS | landfall north FL then turned and tracked up the GA, SC, NC coast as a TS                                                        |
| Debby      | 6/27/2012  | NONE         | TD | landfall as TS west FL moved across FL and went offshore as TD                                                                   |
| Isaac      | 8/27/2012  | NONE         | TS | KW, FL only                                                                                                                      |
| Leslie     | 9/10/2012  | NONE         | H1 | tracked north along east coast fairly far offshore, intensified from TS to H1 at VA/NC border                                    |
| Rafael     | 10/16/2012 | NONE         | H1 | far offshore: 800 miles                                                                                                          |
| Sandy      | 10/28/2012 | NJ           | H1 | tracked north along east coast as H1, changed to an extratropical storm off NJ                                                   |
| Andrea     | 6/8/2013   | NONE         | TS | landfall west FL tracked US east coast coming closest in GA and moving offshore at VA all the way up the coast                   |
| Dorian     | 8/2/2013   | NONE         | TS | got very close to south FL, fizzled out at SC/NC border                                                                          |
| Arthur     | 7/4/2014   | NC           | H2 | tracked along entire US east coast as TS, then H1, then H2 at landfall, then back to H1 off VA and northward, back to TS off MA  |
| Cristobal  | 8/27/2014  | NONE         | H1 | stayed offshore but tracked the east coast                                                                                       |
| Anna       | 5/10/2015  | SC/NC border | TS | early storm, landfall in SC/NC went inland then back offshore at VA as TS                                                        |
| Claudette  | 7/12/2015  | NONE         | TD | originated off NC coast as TD then moved offshore                                                                                |
| Joaquin    | 10/3/2015  | NONE         | H2 | a lot of changing off coast of FL but mostly hurricane status staying off US coast                                               |
| Kate       | 11/10/2015 | NONE         | TS | tracked off FL coast as TS, then intensified to H1 off NC coast                                                                  |
| Bonnie     | 5/29/2016  | SC           | TD | landfall at SC then tracked offshore and made landfall again in NC as TD                                                         |
| Colin      | 6/7/2016   | NONE         | TS | landfall at SC then tracked offshore and made landfall again in NC as TD                                                         |
| Eight 2016 | 8/31/2016  | NONE         | TD | approached NC then turned offshore                                                                                               |

|              |            |                |     |                                                                                                                      |
|--------------|------------|----------------|-----|----------------------------------------------------------------------------------------------------------------------|
| Hermine      | 9/3/2016   | NONE           | TS  | made landfall in west FL, tracked across SE US and came offshore as TS in NC, came close again off Long Island       |
| Julia        | 9/14/2016  | FL             | TS  | strange path, 2 landfalls - one in FL one in NC                                                                      |
| Matthew      | 10/7/2016  | SC             | H2  | tracked along FL coast as H4 and H3, weakened to H2 off GA, H1 landfall in SC and went back along coast as H1 and TS |
| Emily        | 8/1/2017   | NONE           | TD  | offshore moving track off FL                                                                                         |
| Gert         | 8/15/2017  | NONE           | H1  | storm track US east coast, TS in FL, intensifying to H1 and H2 to north                                              |
| Unnamed 2017 | 8/29/2017  | NC             | TS  | tracked coast from GA to NC as TS                                                                                    |
| Irma         | 9/10/2017  | KW, FL         | H4  | directly over Key West, landfall SW FL                                                                               |
| Jose         | 9/17/2017  | NONE           | H1  | tracked north along US east coast as H1, then downgrading to TS at VA/NC border                                      |
| Maria        | 9/27/2017  | NONE           | H1  | approached FL as H3, downgraded to H2 offshore FL, then H1 from GA to VA at closest approach, then offshore as TS    |
| Beryl        | 7/13/2018  | NONE           | TS  | offshore track, varied from TD to TS                                                                                 |
| Chris        | 7/8/2018   | NONE           | H1  | offshore track, stalled, intensified from a TS to H2 and turned right off NC and followed the coast offshore         |
| Gordon       | 9/3/2018   | FL             | TS  |                                                                                                                      |
| Florence     | 9/14/2018  | NC/SC border   | H2  | H1 at landfall                                                                                                       |
| Michael      | 10/12/2018 | NONE           | TS  | landfall in Gulf of Mexico, offshore moving track off VA                                                             |
| Erin         | 8/28/2019  | NONE           | TS  | offshore track, varied from TD to TS, off coast of NC and VA                                                         |
| Dorian       | 9/6/2019   | NC             | H2  | tracked entire US east coast from 9/2-9/7, skirted OBX 9/6 as H2 but fluctuated from H2 to H4                        |
| Humberto     | 9/16/2019  | NONE           | H2  | offshore moving track, closest near FL than intensifying to H3 off NC coast                                          |
| Melissa      | 10/11/2019 | NONE           | TS  | offshore moving track starting in NC, stalling off DELMARVA coast before continuing                                  |
| Nestor       | 10/21/2019 | VA             | ET? | offshore moving track, classified as ET but winds app. 40 kt                                                         |
| Bertha       | 5/27/2020  | SC             | TS  |                                                                                                                      |
| Fay          | 7/10/2020  | NC, VA, DE, NJ | TS  | offshore track at SC, then intensified and tracked north from NC to NJ                                               |
| Isaias       | 8/3/2020   | SC/NC          | H1  | TS along FL coast intensifying to H1 land fall SC/NC border                                                          |

|        |            |                              |    |                                                                                                               |
|--------|------------|------------------------------|----|---------------------------------------------------------------------------------------------------------------|
| Omar   | 8/30/2020  | NONE                         | TD | started as TD off FL coast, tracked along NC as a TD intensifying to TS                                       |
| Sally  | 9/12/2020  | FL                           | TD |                                                                                                               |
| Eta    | 11/8/2020  | KW, FL                       | TS | TS along south FL coast intensifying to H1 land fall west coast FL, then offshore track as TS at FL-GA border |
| Danny  | 6/28/2021  | SC                           | TS |                                                                                                               |
| Elsa   | 7/6/2021   | KW, FL                       | TS |                                                                                                               |
| Fred   | 8/14/2021  | KW, FL                       | TD |                                                                                                               |
| Henri  | 8/22/2021  | Montauk Pt, NY               | TS |                                                                                                               |
| Ida    | 8/28/2021  | KW, FL                       | H1 |                                                                                                               |
| Mindy  | 9/9/2021   | GA                           | TD | offshore moving track                                                                                         |
| Alex   | 6/4/2022   | west FL, then east FL        | TS | offshore moving track                                                                                         |
| Colin  | 7/2/2022   | SC                           | TS |                                                                                                               |
| Ian    | 9/28/2022  | west FL, then east FL and SC | H4 | offshore moving track                                                                                         |
| Nicole | 11/10/2022 | east FL                      | H1 |                                                                                                               |
